# Supplementary material
Source: Research Square preprint supplement (doi:10.21203/rs.3.rs-7375012/v1)
Supplement: Supplementary file 1 [file 4cd8d1e2f259dfdab520cd61.xlsx]

## Sheet: Table S1 metadata
	Table S1. List of Lepus spp. samples collected from the Val Mazia/Matschertal LTSER. For each fecal sample, the table reports the sample type, host species, host species acronym and sample metadata
	Sample ID	Sample type	Species	Species acronym	Year collected	Elevation (m asl)	Site	Replicate Type	Sample or Control
	MV-LEU_1009	feces	L. timidus	LTI	2020	2500	2	biological	Sample
	MV-LEU_1013	feces	L. timidus	LTI	2020	2500	2	biological	Sample
	MV-LEU_1021	feces	L. europaeus	LEU	2020	1500	2	biological	Sample
	MV-LEU_1022	feces	L. europaeus	LEU	2020	1500	2	biological	Sample
	MV-LEU_1024	feces	L. europaeus	LEU	2020	1500	4	biological	Sample
	MV-LEU_1025	feces	L. europaeus	LEU	2020	1000	4	biological	Sample
	MV-LEU_1026	feces	L. europaeus	LEU	2020	1000	4	biological	Sample
	MV-LEU_106	feces	L. timidus	LTI	2019	2500	1	biological	Sample
	MV-LEU_111	feces	L. timidus	LTI	2019	2500	1	biological	Sample
	MV-LEU_118	feces	L. timidus	LTI	2019	2500	3	biological	Sample
	MV-LEU_120	feces	L. timidus	LTI	2019	2500	3	biological	Sample
	MV-LEU_121	feces	L. europaeus	LEU	2019	2500	3	biological	Sample
	MV-LEU_122	feces	L. europaeus	LEU	2019	2500	3	biological	Sample
	MV-LEU_127	feces	L. europaeus	LEU	2019	2000	2	biological	Sample
	MV-LEU_128	feces	L. europaeus	LEU	2019	2000	2	biological	Sample
	MV-LEU_129	feces	L. europaeus	LEU	2019	2000	2	biological	Sample
	MV-LEU_130	feces	L. europaeus	LEU	2019	2000	2	biological	Sample
	MV-LEU_131	feces	L. europaeus	LEU	2019	2000	2	biological	Sample
	MV-LEU_132	feces	L. europaeus	LEU	2019	2000	4	biological	Sample
	MV-LEU_133	feces	L. timidus	LTI	2019	2000	4	biological	Sample
	MV-LEU_135	feces	L. europaeus	LEU	2019	2000	2	biological	Sample
	MV-LEU_136	feces	L. europaeus	LEU	2019	2000	4	biological	Sample
	MV-LEU_138	feces	L. europaeus	LEU	2019	2000	4	biological	Sample
	MV-LEU_139	feces	L. europaeus	LEU	2019	2000	4	biological	Sample
	MV-LEU_142	feces	L. europaeus	LEU	2019	1500	2	biological	Sample
	MV-LEU_143	feces	L. europaeus	LEU	2019	1500	2	biological	Sample
	MV-LEU_144	feces	L. europaeus	LEU	2019	1500	2	biological	Sample
	MV-LEU_145	feces	L. europaeus	LEU	2019	1500	2	biological	Sample
	MV-LEU_146	feces	L. europaeus	LEU	2019	1500	2	biological	Sample
	MV-LEU_147	feces	L. europaeus	LEU	2019	1500	2	biological	Sample
	MV-LEU_149	feces	L. europaeus	LEU	2019	1500	4	biological	Sample
	MV-LEU_150	feces	L. europaeus	LEU	2019	1500	4	biological	Sample
	MV-LEU_151	feces	L. europaeus	LEU	2019	1500	4	biological	Sample
	MV-LEU_152	feces	L. europaeus	LEU	2019	1500	1	biological	Sample
	MV-LEU_153	feces	L. europaeus	LEU	2019	1500	1	biological	Sample
	MV-LEU_154	feces	L. europaeus	LEU	2019	1500	1	biological	Sample
	MV-LEU_156	feces	L. europaeus	LEU	2019	1000	4	biological	Sample
	MV-LEU_157	feces	L. europaeus	LEU	2019	1000	4	biological	Sample
	MV-LEU_158	feces	L. europaeus	LEU	2019	1000	4	biological	Sample
	MV-LEU_159	feces	L. europaeus	LEU	2019	1000	4	biological	Sample
	MV-LEU_160	feces	L. europaeus	LEU	2019	1000	4	biological	Sample
	MV-LEU_163	feces	L. europaeus	LEU	2019	1000	3	biological	Sample
	MV-LEU_165	feces	L. europaeus	LEU	2019	1000	3	biological	Sample
	MV-LEU_166	feces	L. europaeus	LEU	2019	1000	3	biological	Sample
	MV-LEU_170	feces	L. europaeus	LEU	2019	1000	2	biological	Sample
	MV-LEU_171	feces	L. europaeus	LEU	2019	1000	2	biological	Sample
	MV-LEU_172	feces	L. europaeus	LEU	2019	1000	2	biological	Sample
	MV-LEU_173	feces	L. europaeus	LEU	2019	1000	2	biological	Sample
	MV-LEU_49	feces	L. europaeus	LEU	2019	1000	2	biological	Sample
	MV-LEU_503	feces	L. europaeus	LEU	2020	1000	2	biological	Sample
	MV-LEU_506	feces	L. europaeus	LEU	2020	1000	2	biological	Sample
	MV-LEU_51	feces	L. europaeus	LEU	2019	2000	2	biological	Sample
	MV-LEU_512	feces	L. europaeus	LEU	2020	1000	3	biological	Sample
	MV-LEU_53	feces	L. europaeus	LEU	2019	2000	4	biological	Sample
	MV-LEU_616	feces	L. europaeus	LEU	2020	1000	2	biological	Sample
	MV-LEU_617	feces	L. europaeus	LEU	2020	1000	2	biological	Sample
	MV-LEU_620	feces	L. europaeus	LEU	2020	1000	3	biological	Sample
	MV-LEU_621	feces	L. europaeus	LEU	2020	1000	3	biological	Sample
	MV-LEU_622	feces	L. europaeus	LEU	2020	1000	3	biological	Sample
	MV-LEU_626	feces	L. europaeus	LEU	2020	1000	4	biological	Sample
	MV-LEU_636	feces	L. europaeus	LEU	2020	1500	4	biological	Sample
	MV-LEU_638	feces	L. europaeus	LEU	2020	1500	4	biological	Sample
	MV-LEU_657	feces	L. europaeus	LEU	2020	2000	2	biological	Sample
	MV-LEU_659	feces	L. europaeus	LEU	2020	2000	4	biological	Sample
	MV-LEU_660	feces	L. europaeus	LEU	2020	2000	4	biological	Sample
	MV-LEU_661	feces	L. timidus	LTI	2020	2000	4	biological	Sample
	MV-LEU_662	feces	L. timidus	LTI	2020	2000	4	biological	Sample
	MV-LEU_679	feces	L. timidus	LTI	2020	2000	3	biological	Sample
	MV-LEU_690	feces	L. timidus	LTI	2020	2500	3	biological	Sample
	MV-LEU_691	feces	L. timidus	LTI	2020	2500	3	biological	Sample
	MV-LEU_70	feces	L. timidus	LTI	2019	2000	4	biological	Sample
	MV-LEU_703	feces	L. europaeus	LEU	2020	1500	2	biological	Sample
	MV-LEU_706	feces	L. europaeus	LEU	2020	1500	2	biological	Sample
	MV-LEU_715	feces	L. europaeus	LEU	2020	1500	4	biological	Sample
	MV-LEU_72	feces	L. timidus	LTI	2019	2000	4	biological	Sample
	MV-LEU_723	feces	L. europaeus	LEU	2020	1500	1	biological	Sample
	MV-LEU_728	feces	L. europaeus	LEU	2020	1500	1	biological	Sample
	MV-LEU_729	feces	L. europaeus	LEU	2020	1500	1	biological	Sample
	MV-LEU_730	feces	L. europaeus	LEU	2020	1500	1	biological	Sample
	MV-LEU_738	feces	L. europaeus	LEU	2020	1000	2	biological	Sample
	MV-LEU_745	feces	L. europaeus	LEU	2020	1000	4	biological	Sample
	MV-LEU_759	feces	L. europaeus	LEU	2020	1500	1	biological	Sample
	MV-LEU_778	feces	L. europaeus	LEU	2020	2000	2	biological	Sample
	MV-LEU_784	feces	L. europaeus	LEU	2020	2000	4	biological	Sample
	MV-LEU_789	feces	L. europaeus	LEU	2020	2000	4	biological	Sample
	MV-LEU_912	feces	L. europaeus	LEU	2020	1000	3	biological	Sample
	MV-LEU_915	feces	L. europaeus	LEU	2020	1500	2	biological	Sample
	MV-LEU_930	feces	L. europaeus	LEU	2020	2000	3	biological	Sample
	MV-LEU_941	feces	L. timidus	LTI	2020	2500	3	biological	Sample
	MV-LEU_949	feces	L. timidus	LTI	2020	2500	2	biological	Sample
	MV-LEU_95	feces	L. europaeus	LEU	2019	2500	1	biological	Sample
	MV-LEU_953	feces	L. timidus	LTI	2020	2500	2	biological	Sample
	MV-LEU_956	feces	L. timidus	LTI	2020	2500	1	biological	Sample
	MV-LEU_966	feces	L. timidus	LTI	2020	2500	1	biological	Sample
	MV-LEU_972	feces	L. timidus	LTI	2020	2500	2	biological	Sample
	MV-CTR-Kex_1	EXT control	na	na	na	na	na	technical	Control
	MV-CTR-Kex_2	EXT control	na	na	na	na	na	technical	Control
	MV-CTR-Kex_3	EXT control	na	na	na	na	na	technical	Control
	MV-CTR-Kex_4	EXT control	na	na	na	na	na	technical	Control
	MV-CTR-Kex_5	EXT control	na	na	na	na	na	technical	Control
	MV-CTR-Kex_6	EXT control	na	na	na	na	na	technical	Control
	MV-CTR-KEx_7	EXT control	na	na	na	na	na	technical	Control
	MV-CTR-KEx_8	EXT control	na	na	na	na	na	technical	Control
	MV-CTR-KEx_9	EXT control	na	na	na	na	na	technical	Control
	MV-CTR-KEx_10	EXT control	na	na	na	na	na	technical	Control
	MV-CTR-KEx_11	EXT control	na	na	na	na	na	technical	Control
	MV-CTR-KEx_12	EXT control	na	na	na	na	na	technical	Control
	MV-CTR-Kpcr_1	PCR control	na	na	na	na	na	technical	Control
	MV-CTR-Kpcr_2	PCR control	na	na	na	na	na	technical	Control
	MV-CTR-Kpcr_3	PCR control	na	na	na	na	na	technical	Control
	MV-CTR-Kpcr_4	PCR control	na	na	na	na	na	technical	Control
	MV-CTR-KPCR_5	PCR control	na	na	na	na	na	technical	Control
	MV-CTR-KPCR_6	PCR control	na	na	na	na	na	technical	Control
	MV-CTR-KPCR_7	PCR control	na	na	na	na	na	technical	Control
	MV-CTR-KPCR_8	PCR control	na	na	na	na	na	technical	Control
	MV-CTR-KPCR_9	PCR control	na	na	na	na	na	technical	Control
	MV-CTR-KPCR_10	PCR control	na	na	na	na	na	technical	Control
	MV-CTR-KPCR_11	PCR control	na	na	na	na	na	technical	Control
	MV-CTR-KPCR_12	PCR control	na	na	na	na	na	technical	Control
	MV-CTR-KPCR_13	PCR control	na	na	na	na	na	technical	Control

## Sheet: Table S2 - LEfSE
	TABLE S2. Prokaryotic and fungal taxa for which significant differences between hare species Lepus timidus and L. europaeus were detected using method LEfSE (microeco R package). ‘Species’ lists the Lepus species with the higher abundance of bacterial or fungal taxon. For each taxonomic rank, the LDA score, the adjusted p-value (FDR) and significance level are reported; only comparisons with an L…
	Taxon	Species	LDA	P.adj	Significance
	k__Bacteria|p__Actinobacteriota|c__Coriobacteriia	L. europaeus	4.01916	1.69021e-05	***
	k__Bacteria|p__Actinobacteriota|c__Coriobacteriia|o__Coriobacteriales	L. europaeus	4.01916	1.69021e-05	***
	k__Bacteria|p__Actinobacteriota|c__Coriobacteriia|o__Coriobacteriales|f__Atopobiaceae	L. europaeus	3.5582	0.000370899	***
	k__Bacteria|p__Actinobacteriota|c__Coriobacteriia|o__Coriobacteriales|f__Atopobiaceae|g__Coriobacteriaceae UCG-002	L. europaeus	3.18175	0.000284866	***
	k__Bacteria|p__Actinobacteriota|c__Coriobacteriia|o__Coriobacteriales|f__Eggerthellaceae	L. europaeus	3.7234	1.17106e-05	***
	k__Bacteria|p__Actinobacteriota|c__Coriobacteriia|o__Coriobacteriales|f__Eggerthellaceae|g__Enterorhabdus	L. europaeus	3.25346	8.03672e-06	***
	k__Bacteria|p__Actinobacteriota|c__Coriobacteriia|o__Coriobacteriales|f__Eggerthellaceae|g__Enteroscipio	L. europaeus	3.41327	2.14783e-05	***
	k__Bacteria|p__Bacteroidota|c__Bacteroidia|o__Bacteroidales	L. europaeus	4.89089	7.56207e-06	***
	k__Bacteria|p__Bacteroidota|c__Bacteroidia|o__Bacteroidales|f__Bacteroidaceae	L. europaeus	4.62312	5.2759e-06	***
	k__Bacteria|p__Bacteroidota|c__Bacteroidia|o__Bacteroidales|f__Bacteroidaceae|g__Bacteroides	L. europaeus	4.62312	5.2759e-06	***
	k__Bacteria|p__Bacteroidota|c__Bacteroidia|o__Bacteroidales|f__Bacteroidaceae|g__Bacteroides|s__caccae	L. europaeus	3.03124	0.00475229	**
	k__Bacteria|p__Bacteroidota|c__Bacteroidia|o__Bacteroidales|f__Bacteroidaceae|g__Bacteroides|s__uniformis	L. europaeus	3.91106	7.56207e-06	***
	k__Bacteria|p__Bacteroidota|c__Bacteroidia|o__Bacteroidales|f__Bacteroidaceae|g__Bacteroides|s__vulgatus	L. europaeus	3.98717	3.76271e-05	***
	k__Bacteria|p__Bacteroidota|c__Bacteroidia|o__Bacteroidales|f__Marinifilaceae	L. europaeus	3.34939	1.58564e-05	***
	k__Bacteria|p__Bacteroidota|c__Bacteroidia|o__Bacteroidales|f__Marinifilaceae|g__Sanguibacteroides	L. europaeus	3.32699	1.58564e-05	***
	k__Bacteria|p__Bacteroidota|c__Bacteroidia|o__Bacteroidales|f__Prevotellaceae	L. europaeus	4.13451	0.00986705	**
	k__Bacteria|p__Bacteroidota|c__Bacteroidia|o__Bacteroidales|f__Rikenellaceae	L. europaeus	3.88627	7.56207e-06	***
	k__Bacteria|p__Bacteroidota|c__Bacteroidia|o__Bacteroidales|f__Rikenellaceae|g__Alistipes	L. europaeus	3.33321	7.56207e-06	***
	k__Bacteria|p__Bacteroidota|c__Bacteroidia|o__Bacteroidales|f__Tannerellaceae	L. europaeus	3.32834	3.27354e-05	***
	k__Bacteria|p__Bacteroidota|c__Bacteroidia|o__Bacteroidales|f__Tannerellaceae|g__Parabacteroides	L. europaeus	3.153	3.76271e-05	***
	k__Bacteria|p__Bacteroidota|c__Bacteroidia|o__Sphingobacteriales|f__Sphingobacteriaceae|g__Pedobacter|s__hartonius	L. europaeus	3.1184	0.00986705	**
	k__Bacteria|p__Firmicutes	L. europaeus	5.47182	5.2759e-06	***
	k__Bacteria|p__Firmicutes|c__Bacilli	L. europaeus	4.74002	5.2759e-06	***
	k__Bacteria|p__Firmicutes|c__Bacilli|o__Erysipelotrichales	L. europaeus	4.64407	5.2759e-06	***
	k__Bacteria|p__Firmicutes|c__Bacilli|o__Erysipelotrichales|f__Erysipelatoclostridiaceae	L. europaeus	4.64341	5.2759e-06	***
	k__Bacteria|p__Firmicutes|c__Bacilli|o__Erysipelotrichales|f__Erysipelatoclostridiaceae|g__UCG-004	L. europaeus	4.6344	5.2759e-06	***
	k__Bacteria|p__Firmicutes|c__Clostridia	L. europaeus	5.37496	6.551e-06	***
	k__Bacteria|p__Firmicutes|c__Clostridia|o__Christensenellales	L. europaeus	4.47649	7.56207e-06	***
	k__Bacteria|p__Firmicutes|c__Clostridia|o__Christensenellales|f__Christensenellaceae	L. europaeus	4.47649	7.56207e-06	***
	k__Bacteria|p__Firmicutes|c__Clostridia|o__Christensenellales|f__Christensenellaceae|g__Christensenellaceae R-7 group	L. europaeus	4.4763	7.56207e-06	***
	k__Bacteria|p__Firmicutes|c__Clostridia|o__Clostridia UCG-014	L. europaeus	4.17722	7.56207e-06	***
	k__Bacteria|p__Firmicutes|c__Clostridia|o__Eubacteriales	L. europaeus	3.45805	1.58564e-05	***
	k__Bacteria|p__Firmicutes|c__Clostridia|o__Eubacteriales|f__Eubacteriaceae	L. europaeus	3.4581	3.27858e-05	***
	k__Bacteria|p__Firmicutes|c__Clostridia|o__Lachnospirales	L. europaeus	4.86054	5.2759e-06	***
	k__Bacteria|p__Firmicutes|c__Clostridia|o__Lachnospirales|f__Lachnospiraceae	L. europaeus	4.85975	5.2759e-06	***
	k__Bacteria|p__Firmicutes|c__Clostridia|o__Lachnospirales|f__Lachnospiraceae|g__A2	L. europaeus	3.68442	3.27354e-05	***
	k__Bacteria|p__Firmicutes|c__Clostridia|o__Lachnospirales|f__Lachnospiraceae|g__Acetitomaculum	L. europaeus	3.0707	1.58564e-05	***
	k__Bacteria|p__Firmicutes|c__Clostridia|o__Lachnospirales|f__Lachnospiraceae|g__Roseburia	L. europaeus	3.73491	9.02085e-05	***
	k__Bacteria|p__Firmicutes|c__Clostridia|o__Lachnospirales|f__Lachnospiraceae|g__Tyzzerella	L. europaeus	3.8415	5.2759e-06	***
	k__Bacteria|p__Firmicutes|c__Clostridia|o__Monoglobales	L. europaeus	4.13103	9.28275e-05	***
	k__Bacteria|p__Firmicutes|c__Clostridia|o__Monoglobales|f__Monoglobaceae	L. europaeus	4.13103	9.28275e-05	***
	k__Bacteria|p__Firmicutes|c__Clostridia|o__Monoglobales|f__Monoglobaceae|g__Monoglobus	L. europaeus	4.13103	9.28275e-05	***
	k__Bacteria|p__Firmicutes|c__Clostridia|o__Oscillospirales	L. europaeus	4.99677	7.56207e-06	***
	k__Bacteria|p__Firmicutes|c__Clostridia|o__Oscillospirales|f__[Eubacterium] coprostanoligenes group	L. europaeus	4.11437	8.44406e-06	***
	k__Bacteria|p__Firmicutes|c__Clostridia|o__Oscillospirales|f__Oscillospiraceae	L. europaeus	4.17753	2.08545e-05	***
	k__Bacteria|p__Firmicutes|c__Clostridia|o__Oscillospirales|f__Oscillospiraceae|g__Colidextribacter	L. europaeus	3.60532	1.58564e-05	***
	k__Bacteria|p__Firmicutes|c__Clostridia|o__Oscillospirales|f__Oscillospiraceae|g__Intestinimonas	L. europaeus	3.81451	0.00148805	**
	k__Bacteria|p__Firmicutes|c__Clostridia|o__Oscillospirales|f__Ruminococcaceae	L. europaeus	4.82491	5.3546e-06	***
	k__Bacteria|p__Firmicutes|c__Clostridia|o__Oscillospirales|f__Ruminococcaceae|g__CAG-352	L. europaeus	3.73413	1.85654e-05	***
	k__Bacteria|p__Firmicutes|c__Clostridia|o__Oscillospirales|f__Ruminococcaceae|g__Ruminococcus	L. europaeus	4.7568	5.74125e-06	***
	k__Bacteria|p__Firmicutes|c__Clostridia|o__Oscillospirales|f__Ruminococcaceae|g__Subdoligranulum	L. europaeus	3.21007	3.76271e-05	***
	k__Bacteria|p__Firmicutes|c__Clostridia|o__Oscillospirales|f__UCG-010	L. europaeus	3.50075	1.58564e-05	***
	k__Bacteria|p__Patescibacteria|c__Saccharimonadia|o__Saccharimonadales|f__Saccharimonadaceae	L. europaeus	3.8598	0.000357831	***
	k__Bacteria|p__Patescibacteria|c__Saccharimonadia|o__Saccharimonadales|f__Saccharimonadaceae|g__Candidatus Saccharimonas	L. europaeus	3.90837	2.50305e-05	***
	k__Bacteria|p__Spirochaetota	L. europaeus	4.1087	1.58564e-05	***
	k__Bacteria|p__Spirochaetota|c__Spirochaetia	L. europaeus	4.1087	1.58564e-05	***
	k__Bacteria|p__Spirochaetota|c__Spirochaetia|o__Spirochaetales	L. europaeus	4.1087	1.58564e-05	***
	k__Bacteria|p__Spirochaetota|c__Spirochaetia|o__Spirochaetales|f__Spirochaetaceae	L. europaeus	4.1087	1.58564e-05	***
	k__Bacteria|p__Spirochaetota|c__Spirochaetia|o__Spirochaetales|f__Spirochaetaceae|g__Sphaerochaeta	L. europaeus	4.1087	1.58564e-05	***
	k__Bacteria|p__Synergistota	L. europaeus	3.40057	5.2759e-06	***
	k__Bacteria|p__Synergistota|c__Synergistia	L. europaeus	3.40057	5.2759e-06	***
	k__Bacteria|p__Synergistota|c__Synergistia|o__Synergistales	L. europaeus	3.40057	5.2759e-06	***
	k__Bacteria|p__Synergistota|c__Synergistia|o__Synergistales|f__Synergistaceae	L. europaeus	3.40057	5.2759e-06	***
	k__Bacteria|p__Synergistota|c__Synergistia|o__Synergistales|f__Synergistaceae|g__Pyramidobacter	L. europaeus	3.28033	5.2759e-06	***
	k__Bacteria|p__Verrucomicrobiota|c__Lentisphaeria	L. europaeus	3.67065	7.56207e-06	***
	k__Bacteria|p__Verrucomicrobiota|c__Lentisphaeria|o__Victivallales	L. europaeus	3.67065	7.56207e-06	***
	k__Bacteria|p__Verrucomicrobiota|c__Lentisphaeria|o__Victivallales|f__Victivallaceae	L. europaeus	3.67065	7.56207e-06	***
	k__Bacteria|p__Verrucomicrobiota|c__Lentisphaeria|o__Victivallales|f__Victivallaceae|g__Victivallis	L. europaeus	3.62786	7.56207e-06	***
	k__Bacteria|p__Abditibacteriota	L. timidus	3.17481	1.58564e-05	***
	k__Bacteria|p__Abditibacteriota|c__Abditibacteria	L. timidus	3.17481	1.58564e-05	***
	k__Bacteria|p__Abditibacteriota|c__Abditibacteria|o__Abditibacteriales	L. timidus	3.17481	1.58564e-05	***
	k__Bacteria|p__Abditibacteriota|c__Abditibacteria|o__Abditibacteriales|f__Abditibacteriaceae	L. timidus	3.17481	1.58564e-05	***
	k__Bacteria|p__Abditibacteriota|c__Abditibacteria|o__Abditibacteriales|f__Abditibacteriaceae|g__Abditibacterium	L. timidus	3.17481	1.58564e-05	***
	k__Bacteria|p__Acidobacteriota	L. timidus	3.94382	7.56207e-06	***
	k__Bacteria|p__Acidobacteriota|c__Acidobacteriae	L. timidus	3.93885	7.56207e-06	***
	k__Bacteria|p__Acidobacteriota|c__Acidobacteriae|o__Acidobacteriales	L. timidus	3.93874	7.56207e-06	***
	k__Bacteria|p__Acidobacteriota|c__Acidobacteriae|o__Acidobacteriales|f__Acidobacteriaceae (Subgroup 1)	L. timidus	3.93874	7.56207e-06	***
	k__Bacteria|p__Acidobacteriota|c__Acidobacteriae|o__Acidobacteriales|f__Acidobacteriaceae (Subgroup 1)|g__Granulicella	L. timidus	3.39795	0.000464637	***
	k__Bacteria|p__Acidobacteriota|c__Acidobacteriae|o__Acidobacteriales|f__Acidobacteriaceae (Subgroup 1)|g__Terriglobus	L. timidus	3.78318	7.56207e-06	***
	k__Bacteria|p__Acidobacteriota|c__Acidobacteriae|o__Acidobacteriales|f__Acidobacteriaceae (Subgroup 1)|g__Terriglobus|s__roseus	L. timidus	3.4287	1.58564e-05	***
	k__Bacteria|p__Actinobacteriota|c__Actinobacteria	L. timidus	4.10674	0.00023275	***
	k__Bacteria|p__Actinobacteriota|c__Actinobacteria|o__Frankiales	L. timidus	3.27408	0.000147366	***
	k__Bacteria|p__Actinobacteriota|c__Actinobacteria|o__Frankiales|f__Nakamurellaceae	L. timidus	3.13335	0.000208422	***
	k__Bacteria|p__Actinobacteriota|c__Actinobacteria|o__Frankiales|f__Nakamurellaceae|g__Nakamurella	L. timidus	3.13335	0.000208422	***
	k__Bacteria|p__Actinobacteriota|c__Actinobacteria|o__Micrococcales	L. timidus	4.08648	0.000464637	***
	k__Bacteria|p__Actinobacteriota|c__Actinobacteria|o__Micrococcales|f__Microbacteriaceae	L. timidus	4.0776	2.46277e-05	***
	k__Bacteria|p__Actinobacteriota|c__Actinobacteria|o__Micrococcales|f__Microbacteriaceae|g__Galbitalea	L. timidus	3.42856	2.85009e-05	***
	k__Bacteria|p__Actinobacteriota|c__Actinobacteria|o__Propionibacteriales	L. timidus	3.86952	8.86781e-05	***
	k__Bacteria|p__Actinobacteriota|c__Actinobacteria|o__Propionibacteriales|f__Nocardioidaceae	L. timidus	3.7963	0.000642701	***
	k__Bacteria|p__Actinobacteriota|c__Actinobacteria|o__Propionibacteriales|f__Nocardioidaceae|g__Aeromicrobium	L. timidus	3.71681	0.000415336	***
	k__Bacteria|p__Actinobacteriota|c__Actinobacteria|o__Propionibacteriales|f__Nocardioidaceae|g__Aeromicrobium|s__ginsengisoli	L. timidus	3.68253	0.000415336	***
	k__Bacteria|p__Actinobacteriota|c__Actinobacteria|o__Propionibacteriales|f__Propionibacteriaceae	L. timidus	3.05952	6.61766e-05	***
	k__Bacteria|p__Bacteroidota|c__Bacteroidia|o__Chitinophagales	L. timidus	3.69969	7.56207e-06	***
	k__Bacteria|p__Bacteroidota|c__Bacteroidia|o__Chitinophagales|f__Chitinophagaceae	L. timidus	3.69969	7.56207e-06	***
	k__Bacteria|p__Bacteroidota|c__Bacteroidia|o__Chitinophagales|f__Chitinophagaceae|g__Aurantisolimonas	L. timidus	3.08093	9.02085e-05	***
	k__Bacteria|p__Bacteroidota|c__Bacteroidia|o__Chitinophagales|f__Chitinophagaceae|g__Edaphobaculum	L. timidus	3.03521	9.02085e-05	***
	k__Bacteria|p__Bacteroidota|c__Bacteroidia|o__Chitinophagales|f__Chitinophagaceae|g__Ferruginibacter	L. timidus	3.01447	0.000464637	***
	k__Bacteria|p__Bacteroidota|c__Bacteroidia|o__Cytophagales	L. timidus	4.21471	5.2759e-06	***
	k__Bacteria|p__Bacteroidota|c__Bacteroidia|o__Cytophagales|f__Hymenobacteraceae	L. timidus	4.10096	5.2759e-06	***
	k__Bacteria|p__Bacteroidota|c__Bacteroidia|o__Cytophagales|f__Hymenobacteraceae|g__Hymenobacter	L. timidus	4.10096	5.2759e-06	***
	k__Bacteria|p__Bacteroidota|c__Bacteroidia|o__Cytophagales|f__Spirosomaceae	L. timidus	3.57319	1.58564e-05	***
	k__Bacteria|p__Bacteroidota|c__Bacteroidia|o__Cytophagales|f__Spirosomaceae|g__Dyadobacter	L. timidus	3.45839	0.000208422	***
	k__Bacteria|p__Bacteroidota|c__Bacteroidia|o__Sphingobacteriales	L. timidus	4.878	8.99811e-06	***
	k__Bacteria|p__Bacteroidota|c__Bacteroidia|o__Sphingobacteriales|f__Sphingobacteriaceae	L. timidus	4.87798	8.99811e-06	***
	k__Bacteria|p__Bacteroidota|c__Bacteroidia|o__Sphingobacteriales|f__Sphingobacteriaceae|g__Mucilaginibacter	L. timidus	4.66724	5.2759e-06	***
	k__Bacteria|p__Bacteroidota|c__Bacteroidia|o__Sphingobacteriales|f__Sphingobacteriaceae|g__Mucilaginibacter|s__galii	L. timidus	3.1866	9.02085e-05	***
	k__Bacteria|p__Bacteroidota|c__Bacteroidia|o__Sphingobacteriales|f__Sphingobacteriaceae|g__Pedobacter	L. timidus	4.35892	1.0223e-05	***
	k__Bacteria|p__Myxococcota	L. timidus	3.35443	0.000129586	***
	k__Bacteria|p__Myxococcota|c__Myxococcia	L. timidus	3.32159	0.000129586	***
	k__Bacteria|p__Myxococcota|c__Myxococcia|o__Myxococcales	L. timidus	3.32159	0.000129586	***
	k__Bacteria|p__Myxococcota|c__Myxococcia|o__Myxococcales|f__Myxococcaceae	L. timidus	3.32159	0.000129586	***
	k__Bacteria|p__Myxococcota|c__Myxococcia|o__Myxococcales|f__Myxococcaceae|g__P3OB-42	L. timidus	3.32389	3.76271e-05	***
	k__Bacteria|p__Patescibacteria|c__Saccharimonadia|o__Saccharimonadales|f__LWQ8	L. timidus	3.08169	0.000464637	***
	k__Bacteria|p__Planctomycetota	L. timidus	3.16636	1.58564e-05	***
	k__Bacteria|p__Planctomycetota|c__Phycisphaerae	L. timidus	3.13606	9.28275e-05	***
	k__Bacteria|p__Planctomycetota|c__Phycisphaerae|o__Tepidisphaerales	L. timidus	3.13606	9.28275e-05	***
	k__Bacteria|p__Planctomycetota|c__Phycisphaerae|o__Tepidisphaerales|f__Tepidisphaeraceae	L. timidus	3.06039	9.02085e-05	***
	k__Bacteria|p__Proteobacteria	L. timidus	5.4044	7.56207e-06	***
	k__Bacteria|p__Proteobacteria|c__Alphaproteobacteria	L. timidus	5.2326	5.2759e-06	***
	k__Bacteria|p__Proteobacteria|c__Alphaproteobacteria|o__Acetobacterales	L. timidus	3.78815	5.2759e-06	***
	k__Bacteria|p__Proteobacteria|c__Alphaproteobacteria|o__Acetobacterales|f__Acetobacteraceae	L. timidus	3.78815	5.2759e-06	***
	k__Bacteria|p__Proteobacteria|c__Alphaproteobacteria|o__Acetobacterales|f__Acetobacteraceae|g__Acidiphilium	L. timidus	3.22193	5.2759e-06	***
	k__Bacteria|p__Proteobacteria|c__Alphaproteobacteria|o__Acetobacterales|f__Acetobacteraceae|g__Acidisphaera	L. timidus	3.30649	3.76271e-05	***
	k__Bacteria|p__Proteobacteria|c__Alphaproteobacteria|o__Acetobacterales|f__Acetobacteraceae|g__Roseomonas	L. timidus	3.01807	1.58564e-05	***
	k__Bacteria|p__Proteobacteria|c__Alphaproteobacteria|o__Caulobacterales	L. timidus	3.28362	1.96904e-05	***
	k__Bacteria|p__Proteobacteria|c__Alphaproteobacteria|o__Caulobacterales|f__Caulobacteraceae	L. timidus	3.28362	1.96904e-05	***
	k__Bacteria|p__Proteobacteria|c__Alphaproteobacteria|o__Rhizobiales	L. timidus	4.45083	7.56207e-06	***
	k__Bacteria|p__Proteobacteria|c__Alphaproteobacteria|o__Rhizobiales|f__Beijerinckiaceae	L. timidus	4.12658	5.80911e-06	***
	k__Bacteria|p__Proteobacteria|c__Alphaproteobacteria|o__Rhizobiales|f__Beijerinckiaceae|g__1174-901-12	L. timidus	3.7695	1.64162e-05	***
	k__Bacteria|p__Proteobacteria|c__Alphaproteobacteria|o__Rhizobiales|f__Beijerinckiaceae|g__Methylobacterium-Methylorubrum	L. timidus	3.27912	5.74125e-06	***
	k__Bacteria|p__Proteobacteria|c__Alphaproteobacteria|o__Rhizobiales|f__Beijerinckiaceae|g__Methylorosula	L. timidus	3.19088	7.56207e-06	***
	k__Bacteria|p__Proteobacteria|c__Alphaproteobacteria|o__Rhizobiales|f__Beijerinckiaceae|g__Methylorosula|s__polaris	L. timidus	3.18198	1.58564e-05	***
	k__Bacteria|p__Proteobacteria|c__Alphaproteobacteria|o__Rhizobiales|f__Beijerinckiaceae|g__Psychroglaciecola	L. timidus	3.60435	5.2759e-06	***
	k__Bacteria|p__Proteobacteria|c__Alphaproteobacteria|o__Rhizobiales|f__Beijerinckiaceae|g__Psychroglaciecola|s__arctica	L. timidus	3.5605	7.56207e-06	***
	k__Bacteria|p__Proteobacteria|c__Alphaproteobacteria|o__Rhizobiales|f__Rhizobiaceae	L. timidus	4.00677	9.5839e-06	***
	k__Bacteria|p__Proteobacteria|c__Alphaproteobacteria|o__Rhizobiales|f__Rhizobiaceae|g__Allorhizobium-Neorhizobium-Pararhizobium-Rhizobium	L. timidus	3.96199	7.56207e-06	***
	k__Bacteria|p__Proteobacteria|c__Alphaproteobacteria|o__Rhizobiales|f__Xanthobacteraceae	L. timidus	3.64246	7.47854e-06	***
	k__Bacteria|p__Proteobacteria|c__Alphaproteobacteria|o__Rhizobiales|f__Xanthobacteraceae|g__Tardiphaga	L. timidus	3.634	7.56207e-06	***
	k__Bacteria|p__Proteobacteria|c__Alphaproteobacteria|o__Rhizobiales|f__Xanthobacteraceae|g__Tardiphaga|s__robiniae	L. timidus	3.5674	7.56207e-06	***
	k__Bacteria|p__Proteobacteria|c__Alphaproteobacteria|o__Sphingomonadales	L. timidus	5.12497	7.56207e-06	***
	k__Bacteria|p__Proteobacteria|c__Alphaproteobacteria|o__Sphingomonadales|f__Sphingomonadaceae	L. timidus	5.12497	7.56207e-06	***
	k__Bacteria|p__Proteobacteria|c__Alphaproteobacteria|o__Sphingomonadales|f__Sphingomonadaceae|g__Novosphingobium	L. timidus	3.78133	7.94712e-05	***
	k__Bacteria|p__Proteobacteria|c__Alphaproteobacteria|o__Sphingomonadales|f__Sphingomonadaceae|g__Polymorphobacter	L. timidus	3.52237	5.2759e-06	***
	k__Bacteria|p__Proteobacteria|c__Alphaproteobacteria|o__Sphingomonadales|f__Sphingomonadaceae|g__Rhizorhapis	L. timidus	3.60475	7.56207e-06	***
	k__Bacteria|p__Proteobacteria|c__Alphaproteobacteria|o__Sphingomonadales|f__Sphingomonadaceae|g__Sphingomonas	L. timidus	5.07598	7.56207e-06	***
	k__Bacteria|p__Proteobacteria|c__Alphaproteobacteria|o__Sphingomonadales|f__Sphingomonadaceae|g__Sphingomonas|s__glacialis	L. timidus	3.8632	5.2759e-06	***
	k__Bacteria|p__Proteobacteria|c__Alphaproteobacteria|o__Sphingomonadales|f__Sphingomonadaceae|g__Sphingomonas|s__mali	L. timidus	3.06513	1.58564e-05	***
	k__Bacteria|p__Proteobacteria|c__Alphaproteobacteria|o__Sphingomonadales|f__Sphingomonadaceae|g__Sphingomonas|s__qilianensis	L. timidus	3.72488	5.2759e-06	***
	k__Bacteria|p__Proteobacteria|c__Gammaproteobacteria	L. timidus	4.90454	0.00458599	**
	k__Bacteria|p__Proteobacteria|c__Gammaproteobacteria|o__Burkholderiales	L. timidus	5.0267	0.00012582	***
	k__Bacteria|p__Proteobacteria|c__Gammaproteobacteria|o__Burkholderiales|f__Comamonadaceae	L. timidus	3.36305	2.08545e-05	***
	k__Bacteria|p__Proteobacteria|c__Gammaproteobacteria|o__Burkholderiales|f__Oxalobacteraceae	L. timidus	5.0211	8.919e-05	***
	k__Bacteria|p__Proteobacteria|c__Gammaproteobacteria|o__Burkholderiales|f__Oxalobacteraceae|g__Massilia	L. timidus	5.01831	8.99811e-06	***
	k__Bacteria|p__Proteobacteria|c__Gammaproteobacteria|o__Burkholderiales|f__Oxalobacteraceae|g__Massilia|s__brevitalea	L. timidus	4.07518	5.2759e-06	***
	k__Bacteria|p__Proteobacteria|c__Gammaproteobacteria|o__Pseudomonadales	L. timidus	3.67688	0.00741558	**
	k__Bacteria|p__Proteobacteria|c__Gammaproteobacteria|o__Pseudomonadales|f__Pseudomonadaceae	L. timidus	3.54641	0.0030132	**
	k__Bacteria|p__Proteobacteria|c__Gammaproteobacteria|o__Pseudomonadales|f__Pseudomonadaceae|g__Pseudomonas	L. timidus	3.5459	0.0030132	**
	k__Fungi|p__Ascomycota|c__Dothideomycetes|o__Pleosporales|f__Sporormiaceae|g__Sporormiella|s__intermedia	L. europaeus	5.08993	0.00175823	**
	k__Fungi|p__Ascomycota|c__Pezizomycetes	L. europaeus	3.85566	0.00413075	**
	k__Fungi|p__Ascomycota|c__Pezizomycetes|o__Pezizales	L. europaeus	3.85566	0.00413075	**
	k__Fungi|p__Ascomycota|c__Pezizomycetes|o__Pezizales|f__|g__Trichobolus	L. europaeus	3.95119	0.00257444	**
	k__Fungi|p__Ascomycota|c__Sordariomycetes|o__Hypocreales|f__Clavicipitaceae	L. europaeus	3.96436	0.00257444	**
	k__Fungi|p__Ascomycota|c__Sordariomycetes|o__Hypocreales|f__Clavicipitaceae|g__Claviceps	L. europaeus	3.96374	0.00257444	**
	k__Fungi|p__Ascomycota|c__Sordariomycetes|o__Sordariales	L. europaeus	4.4285	0.00315391	**
	k__Fungi|p__Basidiomycota|c__Ustilaginomycetes	L. europaeus	4.001	0.00257444	**
	k__Fungi|p__Basidiomycota|c__Ustilaginomycetes|o__Urocystidales	L. europaeus	3.99403	0.00475209	**
	k__Fungi|p__Ascomycota|c__Dothideomycetes|o__Pleosporales|f__Sporormiaceae|g__Preussia|s__octomera	L. timidus	4.54037	0.000868106	***
	k__Fungi|p__Ascomycota|c__Dothideomycetes|o__Pleosporales|f__Sporormiaceae|g__Preussia|s__procaviicola	L. timidus	4.64927	0.00175823	**
	k__Fungi|p__Ascomycota|c__Sordariomycetes|o__Coniochaetales|f__Coniochaetaceae|g__Coniochaeta	L. timidus	4.08208	0.00622158	**
	k__Fungi|p__Ascomycota|c__Sordariomycetes|o__Coniochaetales|f__Coniochaetaceae|g__Coniochaeta|s__polymorpha	L. timidus	3.95481	0.00556816	**
	k__Fungi|p__Basidiomycota|c__Cystobasidiomycetes	L. timidus	3.66836	0.00556816	**
	k__Fungi|p__Basidiomycota|c__Cystobasidiomycetes|o__Cystobasidiales	L. timidus	3.66891	0.00556816	**
	k__Fungi|p__Basidiomycota|c__Cystobasidiomycetes|o__Cystobasidiales|f__Cystobasidiaceae	L. timidus	3.66891	0.00556816	**
	k__Fungi|p__Basidiomycota|c__Cystobasidiomycetes|o__Cystobasidiales|f__Cystobasidiaceae|g__Cystobasidium	L. timidus	3.66931	0.00556816	**
	k__Fungi|p__Basidiomycota|c__Cystobasidiomycetes|o__Cystobasidiales|f__Cystobasidiaceae|g__Cystobasidium|s__pinicola	L. timidus	3.51155	0.00338267	**
	k__Fungi|p__Basidiomycota|c__Tremellomycetes	L. timidus	4.92835	0.00093389	***
	k__Fungi|p__Basidiomycota|c__Tremellomycetes|o__Filobasidiales	L. timidus	4.87904	0.00093389	***
	k__Fungi|p__Basidiomycota|c__Tremellomycetes|o__Filobasidiales|f__Filobasidiaceae	L. timidus	4.87965	0.000868106	***
	k__Fungi|p__Basidiomycota|c__Tremellomycetes|o__Filobasidiales|f__Filobasidiaceae|g__Goffeauzyma	L. timidus	3.25027	0.00211459	**
	k__Fungi|p__Basidiomycota|c__Tremellomycetes|o__Filobasidiales|f__Filobasidiaceae|g__Goffeauzyma|s__gastrica	L. timidus	3.25027	0.00211459	**
	k__Fungi|p__Basidiomycota|c__Tremellomycetes|o__Filobasidiales|f__Filobasidiaceae|g__Naganishia	L. timidus	4.86916	0.000868106	***
	k__Fungi|p__Basidiomycota|c__Tremellomycetes|o__Filobasidiales|f__Filobasidiaceae|g__Naganishia|s__albida	L. timidus	4.48775	0.00093389	***
	k__Fungi|p__Basidiomycota|c__Tremellomycetes|o__Filobasidiales|f__Filobasidiaceae|g__Naganishia|s__diffluens	L. timidus	4.04194	0.000777229	***
	k__Fungi|p__Basidiomycota|c__Tremellomycetes|o__Filobasidiales|f__Filobasidiaceae|g__Naganishia|s__globosa	L. timidus	4.3538	0.000868106	***

## Sheet: Table S3 - PERMANOVA
	TABLE S3. One level PERMANOVA performed for beta diversity estimates on L. europaeus and L. timidus fecal microbiota. The influence of elevation on 16S rRNA gene beta-diversity was tested considering Unweighted Unifrac and Bray-Curtis distances, while Jaccard and Bray-Curtis distances were considered for ITS2. Signif. codes: p-value ≤ 0.001: ***; p-value ≤ 0.01: **; p-value ≤ 0.05: *.
	Species	Community	Diversity Index	Variable	R2	F	Pr(>F)	Significance
	LEU	Prokaryotic (16S rRNA gene)	Bray-Curtis	Elevation	0.06394	1.6166	0.011	*
				Residual	0.93606
			Unweighted Unifrac	Elevation	0.05335	1.3338	0.082
				Residual	0.94665
		Fungi (ITS2)	Bray-Curtis	Elevation	0.15338	4.2876	0.001	***
				Residual	0.84662
			Jaccard	Elevation	0.09802	2.5718	0.001	***
				Residual	0.90198
	LTI	Prokaryotic (16S rRNA gene)	Bray-Curtis	Elevation	0.05806	1.1095	0.307
				Residual	0.94194
			Unweighted Unifrac	Elevation	0.03527	0.658	0.802
				Residual	0.96473
		Fungi (ITS2)	Bray-Curtis	Elevation	0.11783	2.4042	0.018	*
				Residual	0.88217
			Jaccard	Elevation	0.07947	1.5539	0.014	*
				Residual	0.92053

## Sheet: Table S4 - pairwise-PERMANOVA
	TABLE S4. Parwise PERMANOVA performed on beta diversity estimates from L. europaeus and L. timidus fecal microbiota. For each Lepus species, comparions were performed across elevations. Microbial diversity was estimated using Bray-Curtis, Unweighted Unifrac (for 16S rRNA gene only) and Jaccard index (for ITS2 only). Signif. codes: p-value ≤ 0.001: ***; p-value ≤ 0.01: **; p-value ≤ 0.05: *; ns: n…
	Community	Diversity Index	Species	Contrast			R2	F	adjusted P-value	Significance
	Bacteria (16S rRNA gene)	Bray-Curtis	LTI	2000	vs	2500	0.058061	1.10952	0.299	ns
			LEU	1000	vs	1500	0.0360653	1.90815	0.102	ns
				1000	vs	2000	0.043258	1.98941	0.102	ns
				1000	vs	2500	0.0403314	1.17674	0.241	ns
				1500	vs	2000	0.034079	1.5171	0.1395	ns
				1500	vs	2500	0.0436774	1.23315	0.241	ns
				2000	vs	2500	0.0681719	1.46319	0.1395	ns
		Unweighted Unifrac	LTI	2000	vs	2500	0.035266	0.657993	0.802	ns
			LEU	1000	vs	1500	0.0307276	1.61679	0.216	ns
				1000	vs	2000	0.0271211	1.22659	0.3375	ns
				1000	vs	2500	0.0276369	0.795826	0.716	ns
				1500	vs	2000	0.0388335	1.73731	0.216	ns
				1500	vs	2500	0.0443041	1.25167	0.3375	ns
				2000	vs	2500	0.0460373	0.965181	0.5124	ns
	Fungi (ITS2)	Bray-Curtis	LTI	2000	vs	2500	0.117827	2.40416	0.013	*
			LEU	1000	vs	1500	0.106715	6.09263	0.003	**
				1000	vs	2000	0.104102	5.11274	0.003	**
				1000	vs	2500	0.116449	3.6903	0.0072	**
				1500	vs	2000	0.0576029	2.62832	0.011	*
				1500	vs	2500	0.116759	3.56922	0.004	**
				2000	vs	2500	0.127891	2.93292	0.006	**
		Jaccard	LTI	2000	vs	2500	0.0794676	1.5539	0.021	*
			LEU	1000	vs	1500	0.0541012	2.91697	0.0015	**
				1000	vs	2000	0.0768261	3.66166	0.0015	**
				1000	vs	2500	0.0760612	2.30504	0.0015	**
				1500	vs	2000	0.0504001	2.28223	0.0015	**
				1500	vs	2500	0.0646395	1.86588	0.0048	**
				2000	vs	2500	0.0636442	1.3594	0.048	*

## Sheet: Table S5 - Mantel tests 
	Table S5. Association between environmental parameters and microbial diversity as estimated with a Mantel test. Statistical tests were performed using Spearman rank-order (Spearman's ρ) correlation coefficient. P-values were adjusted with FDR. Adjusted p-values < 0.01 are shown in bold.
	Species	Community	Diversity Index	Variable	Spearman's ρ	adjusted P-value
	LEU	Prokaryotic (16S rRNA gene)	Bray-Curtis	Temperature	0.104244	0.036
				Precipitation	0.0117156	0.552
				Plant richness	-0.00935943	0.552
			Unifrac	Temperature	0.0529882	0.21
				Precipitation	0.0164862	0.298
				Plant richness	0.021083	0.298
		Fungi (ITS2)	Bray-Curtis	Temperature	0.287938	0.0015
				Precipitation	0.118442	0.006
				Plant richness	0.123056	0.0015
			Jaccard	Temperature	0.261586	0.001
				Precipitation	0.255051	0.001
				Plant richness	0.278955	0.001
	LTI	Prokaryotic (16S rRNA gene)	Bray-Curtis	Temperature	-0.0122679	0.503
				Precipitation	0.11946	0.471
				Plant richness	0.0473395	0.471
			Unifrac	Temperature	-0.0748099	0.741
				Precipitation	0.106368	0.426
				Plant richness	-0.0492709	0.741
		Fungi (ITS2)	Bray-Curtis	Temperature	0.12444	0.2235
				Precipitation	0.0369239	0.358
				Plant richness	0.125593	0.2235
			Jaccard	Temperature	0.180157	0.1125
				Precipitation	0.0901798	0.206
				Plant richness	0.175253	0.1125
			########################################
	Bacteria	LTI
	Bacteria	LTI
	Bacteria	LTI
	Bacteria	LTI
	Bacteria	LTI
	Bacteria	LTI
	FUNGI	LTI
	FUNGI	LTI
	FUNGI	LTI
	FUNGI	LTI
	FUNGI	LTI
	FUNGI	LTI

## Sheet: Table S6 - Spearman
	Table S6. Association between environmental parameters and L. europaeus fungal ASVs as estimated with Spearman rank-order correlation coefficient (Spearman's ρ). Adjusted p-values (FDR) < 0.01 are shown in bold. Signif. codes: p-value ≤ 0.001: ***; p-value ≤ 0.01: **; p-value ≤ 0.05: *.
	Variable	Genus_ASV	Full taxonomy	Spearman's ρ	AdjPvalue	Significance
	Temperature	g__Alternaria_ASV88	k__Fungi|p__Ascomycota|c__Dothideomycetes|o__Pleosporales|f__Pleosporaceae|g__Alternaria|s__|ASV88|g__Alternaria_ASV88	0.528113	0.000785739	***
	Temperature	g__Ascobolus_ASV189	k__Fungi|p__Ascomycota|c__Pezizomycetes|o__Pezizales|f__Ascobolaceae|g__Ascobolus|s__immersus|ASV189|g__Ascobolus_ASV189	0.39424	0.0311341	*
	Temperature	g__Ascobolus_ASV8	k__Fungi|p__Ascomycota|c__Pezizomycetes|o__Pezizales|f__Ascobolaceae|g__Ascobolus|s__immersus|ASV8|g__Ascobolus_ASV8	0.398337	0.0281479	*
	Temperature	g__Aureobasidium_ASV152	k__Fungi|p__Ascomycota|c__Dothideomycetes|o__Dothideales|f__Saccotheciaceae|g__Aureobasidium|s__pullulans|ASV152|g__Aureobasidium_ASV152	0.428653	0.0110251	*
	Temperature	g__Cladorrhinum_ASV79	k__Fungi|p__Ascomycota|c__Sordariomycetes|o__Sordariales|f__Podosporaceae|g__Cladorrhinum|s__globisporum|ASV79|g__Cladorrhinum_ASV79	0.445509	0.00724651	**
	Temperature	g__Coniochaeta_ASV302	k__Fungi|p__Ascomycota|c__Sordariomycetes|o__Coniochaetales|f__Coniochaetaceae|g__Coniochaeta|s__polymorpha|ASV302|g__Coniochaeta_ASV302	0.486002	0.00276865	**
	Temperature	g__Fusarium_ASV177	k__Fungi|p__Ascomycota|c__Sordariomycetes|o__Hypocreales|f__Nectriaceae|g__Fusarium|s__tricinctum|ASV177|g__Fusarium_ASV177	0.39184	0.0324122	*
	Temperature	g__Juncaceicola_ASV317	k__Fungi|p__Ascomycota|c__Dothideomycetes|o__Pleosporales|f__Phaeosphaeriaceae|g__Juncaceicola|s__|ASV317|g__Juncaceicola_ASV317	-0.459977	0.00514543	**
	Temperature	g__Preussia_ASV213	k__Fungi|p__Ascomycota|c__Dothideomycetes|o__Pleosporales|f__Sporormiaceae|g__Preussia|s__longisporopsis|ASV213|g__Preussia_ASV213	0.445792	0.00724651	**
	Temperature	g__Sporormiella_ASV11	k__Fungi|p__Ascomycota|c__Dothideomycetes|o__Pleosporales|f__Sporormiaceae|g__Sporormiella|s__intermedia|ASV11|g__Sporormiella_ASV11	0.480441	0.00301129	**
	Temperature	g__Sporormiella_ASV110	k__Fungi|p__Ascomycota|c__Dothideomycetes|o__Pleosporales|f__Sporormiaceae|g__Sporormiella|s__vexans|ASV110|g__Sporormiella_ASV110	-0.440541	0.00766185	**
	Temperature	g__Sporormiella_ASV153	k__Fungi|p__Ascomycota|c__Dothideomycetes|o__Pleosporales|f__Sporormiaceae|g__Sporormiella|s__intermedia|ASV153|g__Sporormiella_ASV153	0.466454	0.0045997	**
	Temperature	g__Sporormiella_ASV3	k__Fungi|p__Ascomycota|c__Dothideomycetes|o__Pleosporales|f__Sporormiaceae|g__Sporormiella|s__intermedia|ASV3|g__Sporormiella_ASV3	0.498871	0.0023294	**
	Temperature	g__Sporormiella_ASV37	k__Fungi|p__Ascomycota|c__Dothideomycetes|o__Pleosporales|f__Sporormiaceae|g__Sporormiella|s__intermedia|ASV37|g__Sporormiella_ASV37	-0.42845	0.0110251	*
	Temperature	g__Sporormiella_ASV44	k__Fungi|p__Ascomycota|c__Dothideomycetes|o__Pleosporales|f__Sporormiaceae|g__Sporormiella|s__vexans|ASV44|g__Sporormiella_ASV44	-0.591758	3.1685e-05	***
	Temperature	g__Sporormiella_ASV74	k__Fungi|p__Ascomycota|c__Dothideomycetes|o__Pleosporales|f__Sporormiaceae|g__Sporormiella|s__intermedia|ASV74|g__Sporormiella_ASV74	-0.447968	0.00724651	**
	Temperature	g__Trichobolus_ASV53	k__Fungi|p__Ascomycota|c__Pezizomycetes|o__Pezizales|f__|g__Trichobolus|s__|ASV53|g__Trichobolus_ASV53	0.415211	0.0175174	*
	Temperature	g___ASV105	k__Fungi|p__Ascomycota|c__Dothideomycetes|o__Pleosporales|f__Delitschiaceae|g__|s__|ASV105|g___ASV105	0.494093	0.0023294	**
	Temperature	g___ASV126	k__Fungi|p__Ascomycota|c__|o__|f__|g__|s__|ASV126|g___ASV126	-0.402057	0.025823	*
	Temperature	g___ASV26	k__Fungi|p__Basidiomycota|c__Ustilaginomycetes|o__Ustilaginales|f__Ustilaginaceae|g__|s__|ASV26|g___ASV26	0.411963	0.0187508	*
	Temperature	g___ASV262	k__Fungi|p__Ascomycota|c__Sordariomycetes|o__Coniochaetales|f__Coniochaetaceae|g__|s__|ASV262|g___ASV262	-0.465097	0.0045997	**
	Temperature	g___ASV34	k__Fungi|p__Ascomycota|c__Sordariomycetes|o__Xylariales|f__Xylariaceae|g__|s__|ASV34|g___ASV34	0.441404	0.00766185	**
	Precipitation	g__Bovista_ASV112	k__Fungi|p__Basidiomycota|c__Agaricomycetes|o__Agaricales|f__Lycoperdaceae|g__Bovista|s__plumbea|ASV112|g__Bovista_ASV112	0.442418	0.0330413	*
	Precipitation	g__Curvibasidium_ASV698	k__Fungi|p__Basidiomycota|c__Microbotryomycetes|o__|f__|g__Curvibasidium|s__|ASV698|g__Curvibasidium_ASV698	0.443161	0.0330413	*
	Precipitation	g__Neoascochyta_ASV71	k__Fungi|p__Ascomycota|c__Dothideomycetes|o__Pleosporales|f__Didymellaceae|g__Neoascochyta|s__desmazieri|ASV71|g__Neoascochyta_ASV71	0.435028	0.0337222	*
	Precipitation	g__Preussia_ASV60	k__Fungi|p__Ascomycota|c__Dothideomycetes|o__Pleosporales|f__Sporormiaceae|g__Preussia|s__africana|ASV60|g__Preussia_ASV60	0.480882	0.0176932	*
	Plant richness	g__Alternaria_ASV88	k__Fungi|p__Ascomycota|c__Dothideomycetes|o__Pleosporales|f__Pleosporaceae|g__Alternaria|s__|ASV88|g__Alternaria_ASV88	-0.558702	0.000133218	***
	Plant richness	g__Ascobolus_ASV189	k__Fungi|p__Ascomycota|c__Pezizomycetes|o__Pezizales|f__Ascobolaceae|g__Ascobolus|s__immersus|ASV189|g__Ascobolus_ASV189	-0.405896	0.0225775	*
	Plant richness	g__Aureobasidium_ASV152	k__Fungi|p__Ascomycota|c__Dothideomycetes|o__Dothideales|f__Saccotheciaceae|g__Aureobasidium|s__pullulans|ASV152|g__Aureobasidium_ASV152	-0.508724	0.000887299	***
	Plant richness	g__Cladorrhinum_ASV79	k__Fungi|p__Ascomycota|c__Sordariomycetes|o__Sordariales|f__Podosporaceae|g__Cladorrhinum|s__globisporum|ASV79|g__Cladorrhinum_ASV79	-0.457952	0.00460584	**
	Plant richness	g__Coniochaeta_ASV302	k__Fungi|p__Ascomycota|c__Sordariomycetes|o__Coniochaetales|f__Coniochaetaceae|g__Coniochaeta|s__polymorpha|ASV302|g__Coniochaeta_ASV302	-0.488194	0.00166088	**
	Plant richness	g__Filobasidium_ASV257	k__Fungi|p__Basidiomycota|c__Tremellomycetes|o__Filobasidiales|f__Filobasidiaceae|g__Filobasidium|s__wieringae|ASV257|g__Filobasidium_ASV257	-0.398866	0.0262913	*
	Plant richness	g__Juncaceicola_ASV317	k__Fungi|p__Ascomycota|c__Dothideomycetes|o__Pleosporales|f__Phaeosphaeriaceae|g__Juncaceicola|s__|ASV317|g__Juncaceicola_ASV317	0.419113	0.0159863	*
	Plant richness	g__Preussia_ASV213	k__Fungi|p__Ascomycota|c__Dothideomycetes|o__Pleosporales|f__Sporormiaceae|g__Preussia|s__longisporopsis|ASV213|g__Preussia_ASV213	-0.48685	0.00166088	**
	Plant richness	g__Preussia_ASV29	k__Fungi|p__Ascomycota|c__Dothideomycetes|o__Pleosporales|f__Sporormiaceae|g__Preussia|s__terricola|ASV29|g__Preussia_ASV29	-0.405649	0.0225775	*
	Plant richness	g__Rhizopogon_ASV279	k__Fungi|p__Basidiomycota|c__Agaricomycetes|o__Boletales|f__Rhizopogonaceae|g__Rhizopogon|s__|ASV279|g__Rhizopogon_ASV279	0.416955	0.0163702	*
	Plant richness	g__Schizothecium_ASV256	k__Fungi|p__Ascomycota|c__Sordariomycetes|o__Sordariales|f__Lasiosphaeriaceae|g__Schizothecium|s__vesticola|ASV256|g__Schizothecium_ASV256	-0.381282	0.047109	*
	Plant richness	g__Sporormiella_ASV11	k__Fungi|p__Ascomycota|c__Dothideomycetes|o__Pleosporales|f__Sporormiaceae|g__Sporormiella|s__intermedia|ASV11|g__Sporormiella_ASV11	-0.550213	0.000147935	***
	Plant richness	g__Sporormiella_ASV153	k__Fungi|p__Ascomycota|c__Dothideomycetes|o__Pleosporales|f__Sporormiaceae|g__Sporormiella|s__intermedia|ASV153|g__Sporormiella_ASV153	-0.454937	0.00482182	**
	Plant richness	g__Sporormiella_ASV3	k__Fungi|p__Ascomycota|c__Dothideomycetes|o__Pleosporales|f__Sporormiaceae|g__Sporormiella|s__intermedia|ASV3|g__Sporormiella_ASV3	-0.421428	0.0155671	*
	Plant richness	g__Sporormiella_ASV44	k__Fungi|p__Ascomycota|c__Dothideomycetes|o__Pleosporales|f__Sporormiaceae|g__Sporormiella|s__vexans|ASV44|g__Sporormiella_ASV44	0.605534	1.21335e-05	***
	Plant richness	g__Sporormiella_ASV74	k__Fungi|p__Ascomycota|c__Dothideomycetes|o__Pleosporales|f__Sporormiaceae|g__Sporormiella|s__intermedia|ASV74|g__Sporormiella_ASV74	0.403647	0.0231205	*
	Plant richness	g__Triangularia_ASV214	k__Fungi|p__Ascomycota|c__Sordariomycetes|o__Sordariales|f__Podosporaceae|g__Triangularia|s__pseudopauciseta|ASV214|g__Triangularia_ASV214	-0.457952	0.00460584	**
	Plant richness	g__Trichobolus_ASV53	k__Fungi|p__Ascomycota|c__Pezizomycetes|o__Pezizales|f__|g__Trichobolus|s__|ASV53|g__Trichobolus_ASV53	-0.45904	0.00460584	**
	Plant richness	g___ASV105	k__Fungi|p__Ascomycota|c__Dothideomycetes|o__Pleosporales|f__Delitschiaceae|g__|s__|ASV105|g___ASV105	-0.424458	0.0147894	*
	Plant richness	g___ASV26	k__Fungi|p__Basidiomycota|c__Ustilaginomycetes|o__Ustilaginales|f__Ustilaginaceae|g__|s__|ASV26|g___ASV26	-0.431444	0.0120177	*
	Plant richness	g___ASV262	k__Fungi|p__Ascomycota|c__Sordariomycetes|o__Coniochaetales|f__Coniochaetaceae|g__|s__|ASV262|g___ASV262	0.494683	0.00150811	**
	Plant richness	g___ASV34	k__Fungi|p__Ascomycota|c__Sordariomycetes|o__Xylariales|f__Xylariaceae|g__|s__|ASV34|g___ASV34	-0.530922	0.000336198	***

## Sheet: Table S7 - PICRUST2
	Table S7. MetaCyc pathways with significant differences in abundance between Lepus species and elevations as predicted by PICRUST2. Differential pathways were identified using Wilcoxon rank sum tests. For each contrast (e.g. combination of Species and Altitude), the table reports the MetaCyc classification of predicted pathways (reported as Superclass1, Superclass 2, Pathway and Pathway acronym),…
	Contrast	Superclass 1	Superclass 2	Pathway	Pathway acronym	Log2FC	P.adj	Significance
	LTI_2500 - LEU_2000	Biosynthesis	Amino Acid Biosynthesis	L-glutamate and L-glutamine biosynthesis	PWY-5505	1.69643	0.000173997	***
	LTI_2500 - LEU_2000	Biosynthesis	Amino Acid Biosynthesis	L-isoleucine biosynthesis IV	PWY-5104	1.66792	1.21933e-07	***
	LTI_2500 - LEU_2000	Biosynthesis	Amino Acid Biosynthesis	superpathway of L-aspartate and L-asparagine biosynthesis	ASPASN-PWY	2.05238	9.37702e-05	***
	LTI_2500 - LEU_2000	Biosynthesis	Amino Acid Biosynthesis	superpathway of L-methionine biosynthesis (by sulfhydrylation)	PWY-5345	-1.81247	9.37702e-05	***
	LTI_2500 - LEU_2000	Biosynthesis	Carbohydrate Biosynthesis	glycogen biosynthesis I (from ADP-D-Glucose)	GLYCOGENSYNTH-PWY	1.16653	3.51943e-05	***
	LTI_2500 - LEU_2000	Biosynthesis	Carbohydrate Biosynthesis	superpathway of UDP-glucose-derived O-antigen building blocks biosynthesis	PWY-7328	-0.890279	7.11277e-07	***
	LTI_2500 - LEU_2000	Biosynthesis	Cell Structure Biosynthesis	peptidoglycan biosynthesis IV (Enterococcus faecium)	PWY-6471	2.79952	0.000173997	***
	LTI_2500 - LEU_2000	Biosynthesis	Cofactor. Carrier. and Vitamin Biosynthesis	adenosylcobalamin biosynthesis from cobyrinate a.c-diamide I	PWY-5509	1.05251	2.70721e-05	***
	LTI_2500 - LEU_2000	Biosynthesis	Cofactor. Carrier. and Vitamin Biosynthesis	adenosylcobalamin salvage from cobinamide I	COBALSYN-PWY	1.04198	1.14312e-06	***
	LTI_2500 - LEU_2000	Biosynthesis	Cofactor. Carrier. and Vitamin Biosynthesis	adenosylcobalamin salvage from cobinamide II	PWY-6269	1.05566	3.91928e-06	***
	LTI_2500 - LEU_2000	Biosynthesis	Cofactor. Carrier. and Vitamin Biosynthesis	cob(II)yrinate a.c-diamide biosynthesis II (late cobalt incorporation)	PWY-7376	-4.96571	9.96752e-05	***
	LTI_2500 - LEU_2000	Biosynthesis	Cofactor. Carrier. and Vitamin Biosynthesis	heme biosynthesis I (aerobic)	HEME-BIOSYNTHESIS-II	-3.04978	1.21933e-07	***
	LTI_2500 - LEU_2000	Biosynthesis	Cofactor. Carrier. and Vitamin Biosynthesis	heme biosynthesis II (anaerobic)	HEMESYN2-PWY	-2.18919	1.21933e-07	***
	LTI_2500 - LEU_2000	Biosynthesis	Cofactor. Carrier. and Vitamin Biosynthesis	NAD salvage pathway II	NAD-BIOSYNTHESIS-II	-2.43102	0.00125946	**
	LTI_2500 - LEU_2000	Biosynthesis	Cofactor. Carrier. and Vitamin Biosynthesis	S-adenosyl-L-methionine cycle I	PWY-6151	1.26314	1.21933e-07	***
	LTI_2500 - LEU_2000	Biosynthesis	Cofactor. Carrier. and Vitamin Biosynthesis	superpathay of heme biosynthesis from glutamate	PWY-5918	-2.19806	1.21933e-07	***
	LTI_2500 - LEU_2000	Biosynthesis	Cofactor. Carrier. and Vitamin Biosynthesis	superpathway of heme biosynthesis from glycine	PWY-5920	-3.52379	4.33752e-05	***
	LTI_2500 - LEU_2000	Biosynthesis	Cofactor. Carrier. and Vitamin Biosynthesis	superpathway of pyridoxal 5'-phosphate biosynthesis and salvage	PWY0-845	1.42087	0.000201843	***
	LTI_2500 - LEU_2000	Biosynthesis	Cofactor. Carrier. and Vitamin Biosynthesis	superpathway of thiamin diphosphate biosynthesis II	PWY-6895	4.01975	1.21933e-07	***
	LTI_2500 - LEU_2000	Biosynthesis	Cofactor. Carrier. and Vitamin Biosynthesis	superpathway of ubiquinol-8 biosynthesis (prokaryotic)	UBISYN-PWY	-3.41911	0.000332219	***
	LTI_2500 - LEU_2000	Biosynthesis	Cofactor. Carrier. and Vitamin Biosynthesis	thiazole biosynthesis I (E. coli)	PWY-6892	2.14328	1.21933e-07	***
	LTI_2500 - LEU_2000	Biosynthesis	Cofactor. Carrier. and Vitamin Biosynthesis	ubiquinol-10 biosynthesis (prokaryotic)	PWY-5857	-3.3917	0.000332219	***
	LTI_2500 - LEU_2000	Biosynthesis	Cofactor. Carrier. and Vitamin Biosynthesis	ubiquinol-7 biosynthesis (prokaryotic)	PWY-5855	-3.3917	0.000332219	***
	LTI_2500 - LEU_2000	Biosynthesis	Cofactor. Carrier. and Vitamin Biosynthesis	ubiquinol-8 biosynthesis (prokaryotic)	PWY-6708	-3.3917	0.000332219	***
	LTI_2500 - LEU_2000	Biosynthesis	Cofactor. Carrier. and Vitamin Biosynthesis	ubiquinol-9 biosynthesis (prokaryotic)	PWY-5856	-3.3917	0.000332219	***
	LTI_2500 - LEU_2000	Biosynthesis	Fatty Acid and Lipid Biosynthesis	(5Z)-dodec-5-enoate biosynthesis	PWY0-862	-1.0471	0.000292613	***
	LTI_2500 - LEU_2000	Biosynthesis	Fatty Acid and Lipid Biosynthesis	fatty acid salvage	PWY-7094	-4.06177	0.000199064	***
	LTI_2500 - LEU_2000	Biosynthesis	Fatty Acid and Lipid Biosynthesis	mycolate biosynthesis	PWYG-321	-1.03847	0.000263434	***
	LTI_2500 - LEU_2000	Biosynthesis	Fatty Acid and Lipid Biosynthesis	oleate biosynthesis IV (anaerobic)	PWY-7664	-1.01188	0.000263434	***
	LTI_2500 - LEU_2000	Biosynthesis	Fatty Acid and Lipid Biosynthesis	palmitoleate biosynthesis I (from (5Z)-dodec-5-enoate)	PWY-6282	-1.09329	0.000263434	***
	LTI_2500 - LEU_2000	Biosynthesis	Fatty Acid and Lipid Biosynthesis	stearate biosynthesis II (bacteria and plants)	PWY-5989	-1.12839	0.000263434	***
	LTI_2500 - LEU_2000	Biosynthesis	Fatty Acid and Lipid Biosynthesis	superpathway of fatty acid biosynthesis initiation (E. coli)	FASYN-INITIAL-PWY	-1.09256	0.000292613	***
	LTI_2500 - LEU_2000	Biosynthesis	Nucleoside and Nucleotide Biosynthesis	adenine and adenosine salvage III	PWY-6609	1.67973	1.21933e-07	***
	LTI_2500 - LEU_2000	Biosynthesis	Nucleoside and Nucleotide Biosynthesis	inosine-5'-phosphate biosynthesis III	PWY-7234	-1.80057	1.21933e-07	***
	LTI_2500 - LEU_2000	Biosynthesis	Nucleoside and Nucleotide Biosynthesis	pyrimidine deoxyribonucleotides de novo biosynthesis III	PWY-6545	1.56631	3.51943e-05	***
	LTI_2500 - LEU_2000	Biosynthesis	Nucleoside and Nucleotide Biosynthesis	superpathway of pyrimidine deoxyribonucleotides de novo biosynthesis	PWY-7211	-1.49477	1.14312e-06	***
	LTI_2500 - LEU_2000	Degradation/Utilization/Assimilation	Amine and Polyamine Degradation	4-aminobutanoate degradation V	PWY-5022	-1.79183	0.00160372	**
	LTI_2500 - LEU_2000	Degradation/Utilization/Assimilation	Amine and Polyamine Degradation	aromatic biogenic amine degradation (bacteria)	PWY-7431	-5.73015	8.77365e-05	***
	LTI_2500 - LEU_2000	Degradation/Utilization/Assimilation	Amine and Polyamine Degradation	superpathway of N-acetylglucosamine. N-acetylmannosamine and N-acetylneuraminate degradation	GLCMANNANAUT-PWY	3.82939	1.21933e-07	***
	LTI_2500 - LEU_2000	Degradation/Utilization/Assimilation	Amino Acid Degradation	L-arginine degradation II (AST pathway)	AST-PWY	-2.94709	0.000407505	***
	LTI_2500 - LEU_2000	Degradation/Utilization/Assimilation	Amino Acid Degradation	L-histidine degradation I	HISDEG-PWY	-1.01124	0.000147178	***
	LTI_2500 - LEU_2000	Degradation/Utilization/Assimilation	Amino Acid Degradation	L-histidine degradation II	PWY-5028	-6.07705	8.95892e-05	***
	LTI_2500 - LEU_2000	Degradation/Utilization/Assimilation	Amino Acid Degradation	L-leucine degradation I	LEU-DEG2-PWY	-5.50617	0.000289606	***
	LTI_2500 - LEU_2000	Degradation/Utilization/Assimilation	Amino Acid Degradation	L-tyrosine degradation I	TYRFUMCAT-PWY	-4.18707	0.000332219	***
	LTI_2500 - LEU_2000	Degradation/Utilization/Assimilation	C1 Compound Utilization and Assimilation	incomplete reductive TCA cycle	P42-PWY	1.6449	1.21933e-07	***
	LTI_2500 - LEU_2000	Degradation/Utilization/Assimilation	C1 Compound Utilization and Assimilation	reductive TCA cycle I	P23-PWY	1.18443	0.0149618	*
	LTI_2500 - LEU_2000	Degradation/Utilization/Assimilation	Carbohydrate Degradation	Bifidobacterium shunt	P124-PWY	-1.81473	2.17738e-07	***
	LTI_2500 - LEU_2000	Degradation/Utilization/Assimilation	Carbohydrate Degradation	galactose degradation I (Leloir pathway)	PWY-6317	1.38008	1.21933e-07	***
	LTI_2500 - LEU_2000	Degradation/Utilization/Assimilation	Carbohydrate Degradation	glucose and glucose-1-phosphate degradation	GLUCOSE1PMETAB-PWY	-2.27812	1.11505e-05	***
	LTI_2500 - LEU_2000	Degradation/Utilization/Assimilation	Carbohydrate Degradation	glycogen degradation I (bacterial)	GLYCOCAT-PWY	1.22844	0.000652882	***
	LTI_2500 - LEU_2000	Degradation/Utilization/Assimilation	Carbohydrate Degradation	starch degradation V	PWY-6737	1.21631	0.000332219	***
	LTI_2500 - LEU_2000	Degradation/Utilization/Assimilation	Carbohydrate Degradation	sucrose degradation IV (sucrose phosphorylase)	PWY-5384	-1.27687	0.000173997	***
	LTI_2500 - LEU_2000	Degradation/Utilization/Assimilation	Carbohydrate Degradation	superpathway of glucose and xylose degradation	PWY-6901	0.939798	0.000545122	***
	LTI_2500 - LEU_2000	Degradation/Utilization/Assimilation	Carboxylate Degradation	acetylene degradation	P161-PWY	2.2579	9.37702e-05	***
	LTI_2500 - LEU_2000	Degradation/Utilization/Assimilation	Carboxylate Degradation	pyruvate fermentation to acetate and lactate II	PWY-5100	3.55013	1.21933e-07	***
	LTI_2500 - LEU_2000	Degradation/Utilization/Assimilation	Carboxylate Degradation	superpathway of N-acetylneuraminate degradation	P441-PWY	3.53052	1.21933e-07	***
	LTI_2500 - LEU_2000	Degradation/Utilization/Assimilation	Fatty Acid and Lipid Degradation	fatty acid &beta;-oxidation I	FAO-PWY	-2.68032	8.77365e-05	***
	LTI_2500 - LEU_2000	Degradation/Utilization/Assimilation	Inorganic Nutrient Metabolism	sulfate reduction I (assimilatory)	SO4ASSIM-PWY	-2.10229	1.21933e-07	***
	LTI_2500 - LEU_2000	Degradation/Utilization/Assimilation	Inorganic Nutrient Metabolism	superpathway of sulfate assimilation and cysteine biosynthesis	SULFATE-CYS-PWY	-1.3832	4.20459e-07	***
	LTI_2500 - LEU_2000	Degradation/Utilization/Assimilation	Inorganic Nutrient Metabolism	urea cycle	PWY-4984	-1.0612	0.00144175	**
	LTI_2500 - LEU_2000	Degradation/Utilization/Assimilation	Nucleoside and Nucleotide Degradation	adenosine nucleotides degradation II	SALVADEHYPOX-PWY	-1.71803	9.37702e-05	***
	LTI_2500 - LEU_2000	Degradation/Utilization/Assimilation	Nucleoside and Nucleotide Degradation	purine nucleobases degradation I (anaerobic)	P164-PWY	-1.38107	0.000903412	***
	LTI_2500 - LEU_2000	Degradation/Utilization/Assimilation	Nucleoside and Nucleotide Degradation	purine ribonucleosides degradation	PWY0-1296	1.50798	1.21933e-07	***
	LTI_2500 - LEU_2000	Degradation/Utilization/Assimilation	Nucleoside and Nucleotide Degradation	superpathway of purine deoxyribonucleosides degradation	PWY0-1297	1.40076	1.21933e-07	***
	LTI_2500 - LEU_2000	Degradation/Utilization/Assimilation	Nucleoside and Nucleotide Degradation	superpathway of pyrimidine deoxyribonucleosides degradation	PWY0-1298	2.37606	1.21933e-07	***
	LTI_2500 - LEU_2000	Generation of Precursor Metabolites and Energy	Electron Transfer Chains	aerobic respiration I (cytochrome c)	PWY-3781	-2.8995	1.21933e-07	***
	LTI_2500 - LEU_2000	Generation of Precursor Metabolites and Energy	Fermentation	pyruvate fermentation to acetone	PWY-6588	4.20564	1.70348e-06	***
	LTI_2500 - LEU_2000	Generation of Precursor Metabolites and Energy	Generation of Precursor Metabolites and Energy	glyoxylate cycle	GLYOXYLATE-BYPASS	-2.92537	0.000465864	***
	LTI_2500 - LEU_2000	Generation of Precursor Metabolites and Energy	Superpathways	superpathway of glycolysis. pyruvate dehydrogenase. TCA. and glyoxylate bypass	GLYCOLYSIS-TCA-GLYOX-BYPASS	-2.56007	0.000987954	***
	LTI_2500 - LEU_2000	Generation of Precursor Metabolites and Energy	TCA cycle	TCA cycle IV (2-oxoglutarate decarboxylase)	P105-PWY	-2.74992	0.000263434	***
	LTI_2500 - LEU_2000	Generation of Precursor Metabolites and Energy	TCA cycle	TCA cycle VI (obligate autotrophs)	PWY-5913	-1.08902	1.21933e-07	***
	LTI_2500 - LEU_2000	Generation of Precursor Metabolites and Energy	TCA cycle	TCA cycle VII (acetate-producers)	PWY-7254	-2.66976	0.000903412	***
	LTI_2500 - LEU_2000	Generation of Precursor Metabolites and Energy	TCA cycle	TCA cycle VIII (helicobacter)	REDCITCYC	-1.20953	0.00105852	**
	LTI_2500 - LEU_2000	Macromolecule Modification	Nucleic Acid Processing	tRNA processing	PWY0-1479	-2.41392	1.21933e-07	***
	LTI_2500 - LEU_2000	Superpathways	Superpathways	superpathway of glyoxylate bypass and TCA	TCA-GLYOX-BYPASS	-2.98465	0.000359253	***
	LTI_2500 - LEU_2500	Biosynthesis	Amino Acid Biosynthesis	L-isoleucine biosynthesis IV	PWY-5104	-1.2901	0.0121946	*
	LTI_2500 - LEU_2500	Biosynthesis	Carbohydrate Biosynthesis	glycogen biosynthesis I (from ADP-D-Glucose)	GLYCOGENSYNTH-PWY	-0.950291	0.0407843	*
	LTI_2500 - LEU_2500	Biosynthesis	Cofactor. Carrier. and Vitamin Biosynthesis	heme biosynthesis I (aerobic)	HEME-BIOSYNTHESIS-II	1.05837	0.0223816	*
	LTI_2500 - LEU_2500	Biosynthesis	Cofactor. Carrier. and Vitamin Biosynthesis	heme biosynthesis II (anaerobic)	HEMESYN2-PWY	0.937443	0.0121946	*
	LTI_2500 - LEU_2500	Biosynthesis	Cofactor. Carrier. and Vitamin Biosynthesis	S-adenosyl-L-methionine cycle I	PWY-6151	-0.96365	0.0121946	*
	LTI_2500 - LEU_2500	Biosynthesis	Cofactor. Carrier. and Vitamin Biosynthesis	superpathway of pyridoxal 5'-phosphate biosynthesis and salvage	PWY0-845	-1.99667	0.0121946	*
	LTI_2500 - LEU_2500	Biosynthesis	Cofactor. Carrier. and Vitamin Biosynthesis	superpathway of thiamin diphosphate biosynthesis II	PWY-6895	-4.02485	0.0121946	*
	LTI_2500 - LEU_2500	Biosynthesis	Cofactor. Carrier. and Vitamin Biosynthesis	thiazole biosynthesis I (E. coli)	PWY-6892	-1.74371	0.0121946	*
	LTI_2500 - LEU_2500	Biosynthesis	Nucleoside and Nucleotide Biosynthesis	adenine and adenosine salvage III	PWY-6609	-1.34579	0.0121946	*
	LTI_2500 - LEU_2500	Degradation/Utilization/Assimilation	C1 Compound Utilization and Assimilation	incomplete reductive TCA cycle	P42-PWY	-1.30537	0.0121946	*
	LTI_2500 - LEU_2500	Degradation/Utilization/Assimilation	Carbohydrate Degradation	Bifidobacterium shunt	P124-PWY	1.56658	0.0121946	*
	LTI_2500 - LEU_2500	Degradation/Utilization/Assimilation	Carbohydrate Degradation	galactose degradation I (Leloir pathway)	PWY-6317	-1.20587	0.0121946	*
	LTI_2500 - LEU_2500	Degradation/Utilization/Assimilation	Carboxylate Degradation	pyruvate fermentation to acetate and lactate II	PWY-5100	-3.10203	0.0121946	*
	LTI_2500 - LEU_2500	Degradation/Utilization/Assimilation	Carboxylate Degradation	superpathway of N-acetylneuraminate degradation	P441-PWY	-2.69472	0.0121946	*
	LTI_2500 - LEU_2500	Degradation/Utilization/Assimilation	Inorganic Nutrient Metabolism	sulfate reduction I (assimilatory)	SO4ASSIM-PWY	1.01754	0.0121946	*
	LTI_2500 - LEU_2500	Degradation/Utilization/Assimilation	Inorganic Nutrient Metabolism	superpathway of sulfate assimilation and cysteine biosynthesis	SULFATE-CYS-PWY	0.660482	0.0407843	*
	LTI_2500 - LEU_2500	Degradation/Utilization/Assimilation	Nucleoside and Nucleotide Degradation	adenosine nucleotides degradation II	SALVADEHYPOX-PWY	1.67883	0.0407843	*
	LTI_2500 - LEU_2500	Degradation/Utilization/Assimilation	Nucleoside and Nucleotide Degradation	purine nucleobases degradation I (anaerobic)	P164-PWY	2.63365	0.0407843	*
	LTI_2500 - LEU_2500	Degradation/Utilization/Assimilation	Nucleoside and Nucleotide Degradation	purine ribonucleosides degradation	PWY0-1296	-1.17692	0.0121946	*
	LTI_2500 - LEU_2500	Degradation/Utilization/Assimilation	Nucleoside and Nucleotide Degradation	superpathway of purine deoxyribonucleosides degradation	PWY0-1297	-1.05981	0.0121946	*
	LTI_2500 - LEU_2500	Degradation/Utilization/Assimilation	Nucleoside and Nucleotide Degradation	superpathway of pyrimidine deoxyribonucleosides degradation	PWY0-1298	-1.89988	0.0121946	*
	LTI_2500 - LEU_2500	Generation of Precursor Metabolites and Energy	Electron Transfer Chains	aerobic respiration I (cytochrome c)	PWY-3781	1.2704	0.0121946	*
	LTI_2500 - LEU_2500	Generation of Precursor Metabolites and Energy	Fermentation	pyruvate fermentation to acetone	PWY-6588	-2.92842	0.0223816	*
	LTI_2500 - LEU_2500	Generation of Precursor Metabolites and Energy	TCA cycle	TCA cycle VI (obligate autotrophs)	PWY-5913	1.0534	0.0121946	*
	LEU_2000 - LTI_2000	Biosynthesis	Amino Acid Biosynthesis	L-glutamate and L-glutamine biosynthesis	PWY-5505	1.39286	0.0136806	*
	LEU_2000 - LTI_2000	Biosynthesis	Amino Acid Biosynthesis	L-isoleucine biosynthesis IV	PWY-5104	1.28325	0.00147945	**
	LEU_2000 - LTI_2000	Biosynthesis	Amino Acid Biosynthesis	superpathway of L-aspartate and L-asparagine biosynthesis	ASPASN-PWY	1.79581	0.000263434	***
	LEU_2000 - LTI_2000	Biosynthesis	Amino Acid Biosynthesis	superpathway of L-methionine biosynthesis (by sulfhydrylation)	PWY-5345	-1.67861	0.000407505	***
	LEU_2000 - LTI_2000	Biosynthesis	Carbohydrate Biosynthesis	glycogen biosynthesis I (from ADP-D-Glucose)	GLYCOGENSYNTH-PWY	0.987693	0.00147945	**
	LEU_2000 - LTI_2000	Biosynthesis	Carbohydrate Biosynthesis	superpathway of UDP-glucose-derived O-antigen building blocks biosynthesis	PWY-7328	-1.03227	0.000173997	***
	LEU_2000 - LTI_2000	Biosynthesis	Cell Structure Biosynthesis	peptidoglycan biosynthesis IV (Enterococcus faecium)	PWY-6471	2.00712	0.0125883	*
	LEU_2000 - LTI_2000	Biosynthesis	Cofactor. Carrier. and Vitamin Biosynthesis	adenosylcobalamin biosynthesis from cobyrinate a.c-diamide I	PWY-5509	1.1101	0.0020625	**
	LEU_2000 - LTI_2000	Biosynthesis	Cofactor. Carrier. and Vitamin Biosynthesis	adenosylcobalamin salvage from cobinamide I	COBALSYN-PWY	0.932235	0.000407505	***
	LEU_2000 - LTI_2000	Biosynthesis	Cofactor. Carrier. and Vitamin Biosynthesis	adenosylcobalamin salvage from cobinamide II	PWY-6269	1.11851	0.000173997	***
	LEU_2000 - LTI_2000	Biosynthesis	Cofactor. Carrier. and Vitamin Biosynthesis	cob(II)yrinate a.c-diamide biosynthesis II (late cobalt incorporation)	PWY-7376	-4.6973	0.0020625	**
	LEU_2000 - LTI_2000	Biosynthesis	Cofactor. Carrier. and Vitamin Biosynthesis	heme biosynthesis I (aerobic)	HEME-BIOSYNTHESIS-II	-2.83397	0.000263434	***
	LEU_2000 - LTI_2000	Biosynthesis	Cofactor. Carrier. and Vitamin Biosynthesis	heme biosynthesis II (anaerobic)	HEMESYN2-PWY	-2.06251	0.000263434	***
	LEU_2000 - LTI_2000	Biosynthesis	Cofactor. Carrier. and Vitamin Biosynthesis	NAD salvage pathway II	NAD-BIOSYNTHESIS-II	-1.95031	0.0215959	*
	LEU_2000 - LTI_2000	Biosynthesis	Cofactor. Carrier. and Vitamin Biosynthesis	S-adenosyl-L-methionine cycle I	PWY-6151	1.21229	0.000173997	***
	LEU_2000 - LTI_2000	Biosynthesis	Cofactor. Carrier. and Vitamin Biosynthesis	superpathay of heme biosynthesis from glutamate	PWY-5918	-2.11026	0.000263434	***
	LEU_2000 - LTI_2000	Biosynthesis	Cofactor. Carrier. and Vitamin Biosynthesis	superpathway of heme biosynthesis from glycine	PWY-5920	-3.34049	0.00147945	**
	LEU_2000 - LTI_2000	Biosynthesis	Cofactor. Carrier. and Vitamin Biosynthesis	superpathway of thiamin diphosphate biosynthesis II	PWY-6895	2.08767	0.00704687	**
	LEU_2000 - LTI_2000	Biosynthesis	Cofactor. Carrier. and Vitamin Biosynthesis	superpathway of ubiquinol-8 biosynthesis (prokaryotic)	UBISYN-PWY	-3.16616	0.00147945	**
	LEU_2000 - LTI_2000	Biosynthesis	Cofactor. Carrier. and Vitamin Biosynthesis	thiazole biosynthesis I (E. coli)	PWY-6892	1.75946	0.000407505	***
	LEU_2000 - LTI_2000	Biosynthesis	Cofactor. Carrier. and Vitamin Biosynthesis	ubiquinol-10 biosynthesis (prokaryotic)	PWY-5857	-3.14594	0.00147945	**
	LEU_2000 - LTI_2000	Biosynthesis	Cofactor. Carrier. and Vitamin Biosynthesis	ubiquinol-7 biosynthesis (prokaryotic)	PWY-5855	-3.14594	0.00147945	**
	LEU_2000 - LTI_2000	Biosynthesis	Cofactor. Carrier. and Vitamin Biosynthesis	ubiquinol-8 biosynthesis (prokaryotic)	PWY-6708	-3.14594	0.00147945	**
	LEU_2000 - LTI_2000	Biosynthesis	Cofactor. Carrier. and Vitamin Biosynthesis	ubiquinol-9 biosynthesis (prokaryotic)	PWY-5856	-3.14594	0.00147945	**
	LEU_2000 - LTI_2000	Biosynthesis	Fatty Acid and Lipid Biosynthesis	fatty acid salvage	PWY-7094	-3.7647	0.00553902	**
	LEU_2000 - LTI_2000	Biosynthesis	Nucleoside and Nucleotide Biosynthesis	adenine and adenosine salvage III	PWY-6609	1.22723	0.000263434	***
	LEU_2000 - LTI_2000	Biosynthesis	Nucleoside and Nucleotide Biosynthesis	inosine-5'-phosphate biosynthesis III	PWY-7234	-1.77749	0.000263434	***
	LEU_2000 - LTI_2000	Biosynthesis	Nucleoside and Nucleotide Biosynthesis	superpathway of pyrimidine deoxyribonucleotides de novo biosynthesis	PWY-7211	-1.53636	0.000263434	***
	LEU_2000 - LTI_2000	Degradation/Utilization/Assimilation	Amine and Polyamine Degradation	4-aminobutanoate degradation V	PWY-5022	-1.74471	0.0330374	*
	LEU_2000 - LTI_2000	Degradation/Utilization/Assimilation	Amine and Polyamine Degradation	aromatic biogenic amine degradation (bacteria)	PWY-7431	-5.37535	0.0136806	*
	LEU_2000 - LTI_2000	Degradation/Utilization/Assimilation	Amine and Polyamine Degradation	superpathway of N-acetylglucosamine. N-acetylmannosamine and N-acetylneuraminate degradation	GLCMANNANAUT-PWY	2.3587	0.000263434	***
	LEU_2000 - LTI_2000	Degradation/Utilization/Assimilation	Amino Acid Degradation	L-arginine degradation II (AST pathway)	AST-PWY	-2.53664	0.0100459	*
	LEU_2000 - LTI_2000	Degradation/Utilization/Assimilation	Amino Acid Degradation	L-histidine degradation II	PWY-5028	-5.6962	0.00160372	**
	LEU_2000 - LTI_2000	Degradation/Utilization/Assimilation	Amino Acid Degradation	L-leucine degradation I	LEU-DEG2-PWY	-5.1447	0.01249	*
	LEU_2000 - LTI_2000	Degradation/Utilization/Assimilation	Amino Acid Degradation	L-tyrosine degradation I	TYRFUMCAT-PWY	-3.75941	0.0182327	*
	LEU_2000 - LTI_2000	Degradation/Utilization/Assimilation	Carbohydrate Degradation	Bifidobacterium shunt	P124-PWY	-1.81708	0.000653352	***
	LEU_2000 - LTI_2000	Degradation/Utilization/Assimilation	Carbohydrate Degradation	galactose degradation I (Leloir pathway)	PWY-6317	1.23713	0.000173997	***
	LEU_2000 - LTI_2000	Degradation/Utilization/Assimilation	Carbohydrate Degradation	glucose and glucose-1-phosphate degradation	GLUCOSE1PMETAB-PWY	-2.17671	0.00105046	**
	LEU_2000 - LTI_2000	Degradation/Utilization/Assimilation	Carbohydrate Degradation	glycogen degradation I (bacterial)	GLYCOCAT-PWY	1.10385	0.0020625	**
	LEU_2000 - LTI_2000	Degradation/Utilization/Assimilation	Carbohydrate Degradation	starch degradation V	PWY-6737	1.14376	0.00295297	**
	LEU_2000 - LTI_2000	Degradation/Utilization/Assimilation	Carbohydrate Degradation	sucrose degradation IV (sucrose phosphorylase)	PWY-5384	-1.10928	0.00553902	**
	LEU_2000 - LTI_2000	Degradation/Utilization/Assimilation	Carbohydrate Degradation	superpathway of glucose and xylose degradation	PWY-6901	1.1127	0.00553902	**
	LEU_2000 - LTI_2000	Degradation/Utilization/Assimilation	Carboxylate Degradation	acetylene degradation	P161-PWY	1.46132	0.0174152	*
	LEU_2000 - LTI_2000	Degradation/Utilization/Assimilation	Carboxylate Degradation	pyruvate fermentation to acetate and lactate II	PWY-5100	1.98549	0.000653352	***
	LEU_2000 - LTI_2000	Degradation/Utilization/Assimilation	Carboxylate Degradation	superpathway of N-acetylneuraminate degradation	P441-PWY	1.83397	0.0020625	**
	LEU_2000 - LTI_2000	Degradation/Utilization/Assimilation	Fatty Acid and Lipid Degradation	fatty acid &beta;-oxidation I	FAO-PWY	-2.36815	0.0405704	*
	LEU_2000 - LTI_2000	Degradation/Utilization/Assimilation	Inorganic Nutrient Metabolism	sulfate reduction I (assimilatory)	SO4ASSIM-PWY	-1.86287	0.000263434	***
	LEU_2000 - LTI_2000	Degradation/Utilization/Assimilation	Inorganic Nutrient Metabolism	superpathway of sulfate assimilation and cysteine biosynthesis	SULFATE-CYS-PWY	-1.26484	0.000407505	***
	LEU_2000 - LTI_2000	Degradation/Utilization/Assimilation	Nucleoside and Nucleotide Degradation	adenosine nucleotides degradation II	SALVADEHYPOX-PWY	-1.43024	0.00553902	**
	LEU_2000 - LTI_2000	Degradation/Utilization/Assimilation	Nucleoside and Nucleotide Degradation	purine ribonucleosides degradation	PWY0-1296	1.12116	0.000407505	***
	LEU_2000 - LTI_2000	Degradation/Utilization/Assimilation	Nucleoside and Nucleotide Degradation	superpathway of purine deoxyribonucleosides degradation	PWY0-1297	0.810403	0.0174152	*
	LEU_2000 - LTI_2000	Degradation/Utilization/Assimilation	Nucleoside and Nucleotide Degradation	superpathway of pyrimidine deoxyribonucleosides degradation	PWY0-1298	1.82348	0.000263434	***
	LEU_2000 - LTI_2000	Generation of Precursor Metabolites and Energy	Electron Transfer Chains	aerobic respiration I (cytochrome c)	PWY-3781	-2.78389	0.000173997	***
	LEU_2000 - LTI_2000	Generation of Precursor Metabolites and Energy	Fermentation	pyruvate fermentation to acetone	PWY-6588	1.74896	0.0405704	*
	LEU_2000 - LTI_2000	Generation of Precursor Metabolites and Energy	Generation of Precursor Metabolites and Energy	glyoxylate cycle	GLYOXYLATE-BYPASS	-2.6695	0.00704687	**
	LEU_2000 - LTI_2000	Generation of Precursor Metabolites and Energy	Superpathways	superpathway of glycolysis. pyruvate dehydrogenase. TCA. and glyoxylate bypass	GLYCOLYSIS-TCA-GLYOX-BYPASS	-2.3686	0.0122996	*
	LEU_2000 - LTI_2000	Generation of Precursor Metabolites and Energy	TCA cycle	TCA cycle IV (2-oxoglutarate decarboxylase)	P105-PWY	-2.54247	0.00553902	**
	LEU_2000 - LTI_2000	Generation of Precursor Metabolites and Energy	TCA cycle	TCA cycle VI (obligate autotrophs)	PWY-5913	-0.974482	0.000653352	***
	LEU_2000 - LTI_2000	Generation of Precursor Metabolites and Energy	TCA cycle	TCA cycle VII (acetate-producers)	PWY-7254	-2.44456	0.00704687	**
	LEU_2000 - LTI_2000	Macromolecule Modification	Nucleic Acid Processing	tRNA processing	PWY0-1479	-2.30101	0.000173997	***
	LEU_2000 - LTI_2000	Superpathways	Superpathways	superpathway of glyoxylate bypass and TCA	TCA-GLYOX-BYPASS	-2.73967	0.0111948	*
	LTI_2500 - LTI_2000	Degradation/Utilization/Assimilation	Amine and Polyamine Degradation	superpathway of N-acetylglucosamine. N-acetylmannosamine and N-acetylneuraminate degradation	GLCMANNANAUT-PWY	-1.47069	0.0323898	*
	LTI_2500 - LTI_2000	Degradation/Utilization/Assimilation	C1 Compound Utilization and Assimilation	reductive TCA cycle I	P23-PWY	-1.97446	0.00546218	**
	LTI_2500 - LTI_2000	Degradation/Utilization/Assimilation	Nucleoside and Nucleotide Degradation	purine ribonucleosides degradation	PWY0-1296	-0.38682	0.0407843	*
	LTI_2500 - LTI_2000	Degradation/Utilization/Assimilation	Nucleoside and Nucleotide Degradation	superpathway of purine deoxyribonucleosides degradation	PWY0-1297	-0.590353	0.0407843	*
	LTI_2500 - LTI_2000	Generation of Precursor Metabolites and Energy	Fermentation	pyruvate fermentation to acetone	PWY-6588	-2.45668	0.0183407	*
